# Supplementary material
Source: Springer Nature journal article supplement (https://www.springermedizin.de/resource/supplementary/13046_2008_123_MOESM3_ESM.pdf/9661676)

S

R

L

ET: 6  
TR: 2352.6  
TE: 20.5  
HEAD  
4.0thk/0.0sp  
Id:DCM / Lin:DCM / Id:ID  
W:738 L:369

I

DFOV: 24.0 x 24.0cm

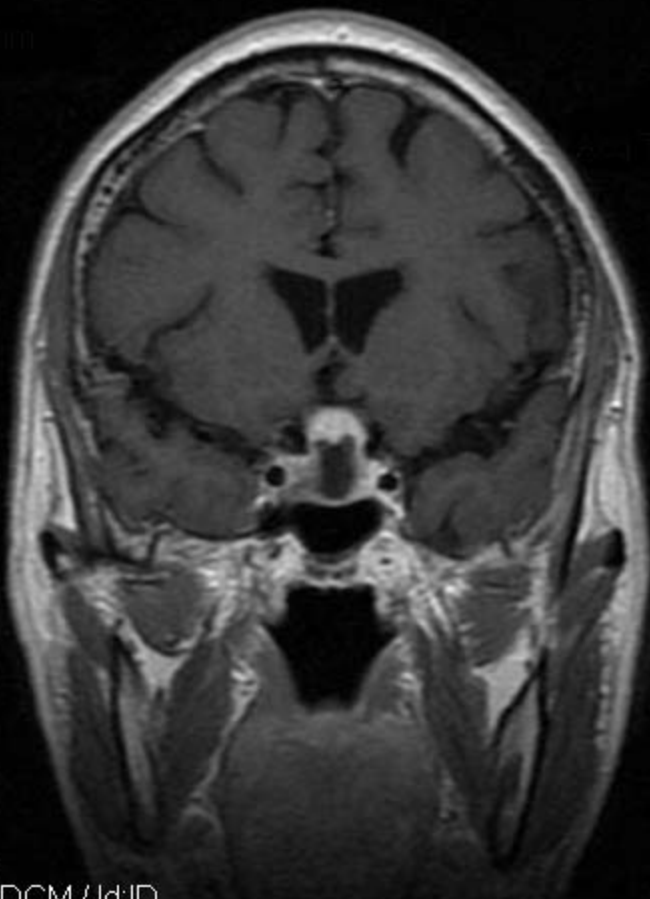

Supplement: MOESM3 [file 9661676]
